# Supplementary material
Source: bioRxiv or medRxiv preprint supplement (https://www.biorxiv.org/highwire/filestream/37481/field_highwire_adjunct_files/0/127571-1.pdf)
Supplement: Supplementary file [file 127571-1.pdf]

Table S1: Details of motion-scrubbing for resting-state fMRI data

| ID                          | Run   | Volumes | Mean FD (mm) | Volumes Scrubbed | Volumes Retained | % Retained |
|-----------------------------|-------|---------|--------------|------------------|------------------|------------|
| <b>3360L</b>                | 1     | 216     | 0.10         | 3                | 213              | 98.61      |
|                             | 2     | 216     | 0.11         | 17               | 199              | 92.13      |
|                             | 3     | 216     | 0.10         | 19               | 197              | 91.20      |
|                             | 4     | 216     | 0.13         | 66               | 150              | 69.44      |
|                             | Total | 864     | 0.11         | 105              | 759              | 87.85      |
| <b>3712L<br/>(excluded)</b> | 1     | 216     | 0.21         | 181              | 35 *             | 16.20 *    |
|                             | 2     | 216     | 0.29         | 212              | 4 *              | 1.85 *     |
|                             | 3     | 216     | 0.17         | 125              | 91 *             | 42.13 *    |
|                             | 4     | 216     | 0.16         | 108              | 108 *            | 50.00 *    |
|                             | Total | 864     | 0.21         | 626              | 0                | 0.00       |
| <b>3749L</b>                | 1     | 120     | 0.12         | 17               | 103              | 85.83      |
|                             | 2     | 120     | 0.12         | 21               | 99               | 82.50      |
|                             | 3     | 120     | 0.13         | 41               | 79               | 65.83      |
|                             | 4     | 120     | 0.14         | 26               | 94               | 78.33      |
|                             | 5     | 120     | 0.23         | 111              | 9 *              | 7.50 *     |
|                             | Total | 600     | 0.15         | 216              | 375              | 62.50      |
| <b>3786L</b>                | 1     | 216     | 0.07         | 0                | 216              | 100.00     |
|                             | 2     | 216     | 0.07         | 0                | 216              | 100.00     |
|                             | 3     | 216     | 0.06         | 9                | 207              | 95.83      |
|                             | 4     | 216     | 0.09         | 12               | 204              | 94.44      |
|                             | Total | 864     | 0.07         | 21               | 843              | 97.57      |
| <b>3753R</b>                | 1     | 130     | 0.04         | 0                | 130              | 100.00     |
|                             | 2     | 130     | 0.04         | 0                | 130              | 100.00     |
|                             | 3     | 130     | 0.04         | 0                | 130              | 100.00     |
|                             | 4     | 130     | 0.05         | 0                | 130              | 100.00     |
|                             | 5     | 130     | 0.05         | 0                | 130              | 100.00     |
|                             | Total | 650     | 0.04         | 0                | 650              | 100.00     |
| <b>3794R</b>                | 1     | 130     | 0.06         | 12               | 118              | 90.77      |
|                             | 2     | 130     | 0.04         | 5                | 125              | 96.15      |
|                             | 3     | 130     | 0.05         | 5                | 125              | 96.15      |
|                             | 4     | 130     | 0.04         | 2                | 128              | 98.46      |
|                             | Total | 520     | 0.05         | 24               | 496              | 95.38      |

\* = Run excluded from further analysis

Table S2. Healthy Comparison Seed Maps

| Disconnection Seed | Region(s)                                                                                                                                                                                                                            | x   | y   | z   | Z-score | Cluster Size |
|--------------------|--------------------------------------------------------------------------------------------------------------------------------------------------------------------------------------------------------------------------------------|-----|-----|-----|---------|--------------|
| 3360L              | L/R Temporal pole, L/R Frontal orbital cortex, L/R Middle Temporal gyrus, L/R Hippocampus, L/R Parahippocampal gyrus, L Superior frontal gyrus, Posterior Cingulate gyrus                                                            | -38 | 20  | -30 | 8.34    | 303,744      |
|                    | Cerebellum (Crus II), Brainstem                                                                                                                                                                                                      | 28  | -76 | -38 | 6.10    | 19,392       |
| 3749L              | L/R Temporal pole, L/R Frontal pole, L/R Frontal Orbital cortex, L Superior Frontal gyrus, L/R Middle Temporal gyrus, L/R Hippocampus, L/R Parahippocampal gyrus, L Lateral Superior Occipital cortex, L/R Posterior Cingulate gyrus | -40 | 22  | -34 | 8.96    | 280,280      |
| 3786L              | L/R Temporal pole, L/R Frontal pole, L Superior frontal gyrus, L/R Middle Temporal gyrus, L Lateral Superior Occipital cortex, L/R Posterior Cingulate cortex, L/R Hippocampus, L/R Parahippocampal gyrus                            | -42 | 18  | -38 | 8.83    | 293,760      |
| 3753R              | R/L Temporal pole, L/R Frontal pole, L/R Middle Temporal gyrus, L/R Frontal Medial cortex, L/R Paracingulate gyrus, L/R Hippocampus, L/R Parahippocampal gyrus, L Lateral Superior Occipital cortex                                  | 40  | 14  | -38 | 7.92    | 251,208      |
| 3794R              | R/L Temporal pole, L/R Frontal pole, L/R Middle Temporal gyrus, L Superior Frontal gyrus, L/R Paracingulate gyrus                                                                                                                    | 42  | 16  | -28 | 8.11    | 284,400      |
|                    | R Supramarginal gyrus, R Angular gyrus, R Middle Temporal gyrus, R Superior Lateral Occipital cortex                                                                                                                                 | 58  | -44 | 18  | 4.27    | 12,288       |

Note: Z-score is voxel and cluster corrected for multiple comparisons at  $p < .05$ . Cluster size is in  $\text{mm}^3$ .

Table S3. Disconnection Seed Maps Z > 3.1 cluster threshold

| Disconnection Seed | Region(s)                                                                                                                                       | x   | y   | z   | Z-score | Cluster Size |
|--------------------|-------------------------------------------------------------------------------------------------------------------------------------------------|-----|-----|-----|---------|--------------|
| 3360L              | L Middle frontal gyrus, L Frontal pole, L Superior frontal gyrus                                                                                | -30 | 38  | 34  | 4.57    | 2,344        |
|                    | L Temporal pole, L Anterior inferior temporal gyrus, L Anterior temporal fusiform cortex                                                        | -42 | 2   | -44 | 4.52    | 1,464        |
|                    | R Frontal Pole                                                                                                                                  | 20  | 44  | 12  | 4.09    | 1,520        |
| 3749L              | L Temporal pole, L Frontal orbital cortex                                                                                                       | -34 | 12  | -26 | 4.27    | 960          |
|                    | R Hippocampus, R amygdala, R Anterior parahippocampal gyrus                                                                                     | 26  | -14 | -20 | 4.21    | 864          |
| 3786L              | L Temporal pole                                                                                                                                 | -44 | 14  | -38 | 4.50    | 3,336        |
| 3753R              | R Temporal pole, R Frontal orbital cortex, R Anterior Temporal fusiform cortex                                                                  | 38  | 18  | -36 | 5.34    | 7,152        |
|                    | L/R Paracingulate gyrus, L/R Anterior cingulate gyrus, R Frontal pole, R Frontal orbital cortex, R Paracingulate gyrus, R Medial frontal cortex | -8  | 38  | -10 | 4.87    | 7,384        |
| 3794R              | R Temporal pole, R Temporal fusiform cortex, R Anterior inferior temporal gyrus, R Anterior parahippocampal gyrus                               | 28  | 8   | -48 | 4.73    | 11,456       |
|                    | R Frontal operculum, R inferior frontal gyrus, R Frontal pole                                                                                   | 34  | 24  | 12  | 4.11    | 1,176        |

Note: Z-score is voxel and cluster corrected for multiple comparisons at  $p < .05$ . Cluster size is in  $\text{mm}^3$ .

Table S4. Disconnection Seed Maps Z > 2.33 cluster threshold

| Disconnection Seed | Region(s)                                                                                                                                                                                 | x   | y    | z   | Z-score | Cluster Size |
|--------------------|-------------------------------------------------------------------------------------------------------------------------------------------------------------------------------------------|-----|------|-----|---------|--------------|
| 3360L              | L/R Middle frontal gyrus, L/R Frontal pole, L Paracingulate gyrus, R precentral gyrus, L Anterior cingulate, L Superior frontal gyrus                                                     | -30 | 38   | 34  | 4.57    | 69,248       |
|                    | L/R Posterior fusiform cortex, L Posterior parahippocampal gyrus, Brainstem                                                                                                               | -4  | -14  | -54 | 4.32    | 26,176       |
|                    | L Temporal pole, L Inferior temporal gyrus, L Temporal fusiform cortex, L Anterior parahippocampal gyrus, L Middle temporal gyrus                                                         | -42 | 2    | -44 | 4.52    | 10,544       |
| 3749L              | L Hippocampus, L Putamen, L Thalamus, L Insula, Brainstem,                                                                                                                                | -28 | -20  | -12 | 4.18    | 11,160       |
|                    | L Temporal pole, L Frontal orbital cortex                                                                                                                                                 | -34 | 12   | -26 | 4.27    | 6,920        |
| 3786L              | R Hippocampus, R amygdala, R Anterior parahippocampal gyrus, R Temporal fusiform cortex, R Inferior Temporal gyrus                                                                        | 26  | -14  | -20 | 4.21    | 6,432        |
|                    | R Occipital pole, R Lateral Occipital cortex, R Occipital fusiform gyrus, L/R Precuneous, L/R Cuneus, R Inferior Temporal gyrus, L/R Lingual gyrus                                        | 12  | -90  | -10 | 4.44    | 28,432       |
|                    | R/L Thalamus, Brainstem, R Posterior Temporal fusiform cortex, R Planum Polare                                                                                                            | 36  | -52  | 16  | 4.49    | 13,272       |
|                    | L Temporal pole, L Anterior parahippocampal gyrus, L Anterior Temporal Fusiform cortex                                                                                                    | -44 | 14   | -38 | 4.50    | 11,560       |
| 3753R              | L Cerebellum, Brainstem                                                                                                                                                                   | -14 | -58  | -54 | 4.67    | 6,808        |
|                    | R Temporal pole, R Frontal orbital cortex, R Frontal Pole, R Anterior Temporal fusiform cortex, R Anterior inferior temporal gyrus, L/R Anterior cingulate gyrus, L/R Paracingulate gyrus | 38  | 18   | -36 | 5.34    | 40,048       |
|                    | R/L Frontal pole                                                                                                                                                                          | -18 | 66   | -8  | 4.89    | 9,704        |
|                    | L/R Posterior cingulate gyrus, L/R Precuneous cortex                                                                                                                                      | 6   | -30  | 32  | 4.06    | 7,400        |
|                    | L/R Occipital pole                                                                                                                                                                        | -12 | -104 | -8  | 4.26    | 7,384        |
| 3794R              |                                                                                                                                                                                           | -16 | -92  | -50 | 3.97    | 5,584        |
|                    | R Temporal pole, R Temporal fusiform cortex, R Anterior inferior temporal gyrus, R Anterior parahippocampal gyrus                                                                         | 28  | 8    | -48 | 4.73    | 21,968       |
|                    | R Frontal operculum, R inferior frontal gyrus, R Middle frontal gyrus R Frontal pole                                                                                                      | 34  | 24   | 12  | 4.11    | 7,976        |
|                    | R/L Thalamus, Brainstem, L Hippocampus, R/L Posterior cingulate gyrus, L Posterior parahippocampal gyrus                                                                                  | -12 | -22  | 16  | 4.24    | 5,696        |
|                    | Brainstem                                                                                                                                                                                 | 20  | -40  | -62 | 4.38    | 5,136        |

|                                                                                                                              |     |     |     |      |       |
|------------------------------------------------------------------------------------------------------------------------------|-----|-----|-----|------|-------|
| L/R Precuneous                                                                                                               | -4  | -72 | 32  | 4.52 | 4,152 |
| R Thalamus, Brainstem, R Pallidum                                                                                            | 14  | -16 | 4   | 4.53 | 3,992 |
| L Posterior temporal fusiform cortex, L Anterior inferior temporal gyrus, L Anterior parahippocampal gyrus , L Temporal pole | -40 | -12 | -32 | 4.43 | 3,912 |
| L Frontal Operculum, L inferior frontal gyrus , L Caudate                                                                    | -38 | 12  | 12  | 4.02 | 2,480 |

---

Note: Z-score is voxel and cluster corrected for multiple comparisons at  $p < .05$ . Cluster size is in  $\text{mm}^3$ .

Table S5. Disconnected ICA components correlated with Smith ICs

| Disconnection Participant | Smith et al. 2009 rs n 10 component | Participant ICA component | Spatial correlation (r) |
|---------------------------|-------------------------------------|---------------------------|-------------------------|
| 3360L                     | 3-Lateral Visual                    | 4                         | .645                    |
|                           | 4-Default Mode                      | 22                        | .245                    |
|                           | 4-Default Mode                      | 58                        | .205                    |
|                           | 5-Cerebellum                        | 5                         | .320                    |
|                           | 6-Sensorimotor                      | 13                        | .262                    |
|                           | 8-Executive control                 | 1                         | .246                    |
| 3749L                     | 1-Primary Visual                    | 2                         | .690                    |
|                           | 2-Occipital Pole                    | 2                         | .212                    |
|                           | 6-Sensorimotor                      | 14                        | .251                    |
|                           | 9-Right frontoparietal              | 13                        | .318                    |
|                           | 10-Left frontoparietal              | 20                        | .423                    |
| 3786L                     | 1-Primary Visual                    | 30                        | .287                    |
|                           | 4-Default Mode                      | 1                         | .459                    |
|                           | 4-Default Mode                      | 24                        | .224                    |
|                           | 9-Right frontoparietal              | 6                         | .463                    |
|                           | 10-Left frontoparietal              | 40                        | .255                    |
| 3753R                     | 7-Auditory                          | 18                        | .356                    |
|                           | 9-Right frontoparietal              | 5                         | .405                    |
|                           | 10-Left frontoparietal              | 30                        | .337                    |
| 3794R                     | 1-Primary Visual                    | 36                        | .350                    |
|                           | 3-Lateral Visual                    | 27                        | .334                    |
|                           | 4-Default Mode                      | 31                        | .385                    |
|                           | 4-Default Mode                      | 12                        | .204                    |
|                           | 5-Cerebellum                        | 32                        | .231                    |
|                           | 7-Auditory                          | 39                        | .263                    |
|                           | 7-Auditory                          | 21                        | .221                    |
|                           | 9-Right frontoparietal              | 14                        | .353                    |
|                           | 9-Right frontoparietal              | 12                        | .242                    |

Table S6. Phase-Scrambled Comparison

| Disconnection Seed | Region(s)                                                                                                                                                                                                    | x   | y   | z   | Z-score | Cluster Size |
|--------------------|--------------------------------------------------------------------------------------------------------------------------------------------------------------------------------------------------------------|-----|-----|-----|---------|--------------|
| 3360L              | L/R Frontal pole, L/R Superior frontal gyrus, L/R Paracingulate gyrus, L/R Cingulate gyrus, L/R accumbens, L/R Temporal pole, L/R Temporal fusiform cortex, R Hippocampus, R Amygdala, Cerebellum, Brainstem | 22  | -54 | -60 | 13.00   | 288,104      |
|                    | L/R Postcentral gyrus, L Precentral gyrus, L Supramarginal gyrus                                                                                                                                             | 6   | -36 | 76  | 6.84    | 18,480       |
|                    | L Temporooccipital Middle Temporal gyrus, L Lateral occipital cortex, L Angular gyrus                                                                                                                        | -46 | -54 | 8   | 6.53    | 7,568        |
|                    | L/R Superior lateral occipital cortex, L/R Occipital pole, L/R Cuneal cortex, L Supracalcarine cortex                                                                                                        | 20  | -78 | 42  | 4.91    | 6,976        |
|                    | R Temporooccipital Middle Temporal gyrus, R Lateral occipital cortex, R Angular gyrus                                                                                                                        | 38  | -56 | 16  | 6.67    | 3,792        |
|                    | R Postcentral gyrus                                                                                                                                                                                          | 60  | -12 | 44  | 6.35    | 2,152        |
| 3749L              | L/R Temporal pole, L/R Inferior frontal gyrus, L/R Insula, L/R Heschl's gyrus, L/R Planum temporale, L/R Frontal pole, L/R Hippocampus, R Temporal fusiform cortex, L/R Thalamus, L/R Lingual gyrus          | -28 | 4   | -46 | 13.00   | 127,912      |
|                    | L/R Superior frontal gyrus, L/R Postcentral gyrus, L/R Superior parietal lobule, L/R Cuneal cortex                                                                                                           | -18 | 14  | 66  | 6.67    | 23,512       |
|                    | L/R Dorsal anterior cingulate cortex, L/R Mid-Cingulate cortex                                                                                                                                               | -6  | 14  | 24  | 5.54    | 3,984        |
|                    | L/R Ventral medial prefrontal cortex, L Frontal pole                                                                                                                                                         | -34 | 48  | -4  | 5.48    | 3,592        |
|                    | L Lateral occipital cortex, R Precuneous cortex, R accumbens                                                                                                                                                 | -32 | -74 | 12  | 5.60    | 2,352        |
|                    | L Middle frontal gyrus, L Frontal pole                                                                                                                                                                       | -38 | 38  | 40  | 4.79    | 2,000        |
| 3786L              | L Temporal pole, L/R Posterior hippocampus, R Thalamus, L/R Lingual gyrus, L/R Occipital pole, Brainstem, Cerebellum                                                                                         | -38 | 6   | -44 | 13.00   | 134,016      |
|                    | L Frontal pole, L Forceps minor                                                                                                                                                                              | -10 | 30  | -2  | 4.52    | 2,312        |
|                    | L Inferior longitudinal fasciculus                                                                                                                                                                           | -28 | -42 | 14  | 5.81    | 2,112        |
| 3753R              | R Temporal pole, R Frontal orbital cortex, R Frontal Pole, R Ventral medial prefrontal cortex, R Anterior cingulate cortex, R Accumbens,                                                                     | 34  | 2   | -48 | 13.00   | 30,448       |
|                    | R/L Posterior parahippocampal gyrus, R Precuneous, R/L Lingual gyrus, R Posterior cingulate cortex                                                                                                           | 24  | -52 | 22  | 5.31    | 19,688       |
|                    | L Ventral medial prefrontal cortex, L Frontal orbital cortex, L Anterior cingulate cortex                                                                                                                    | -10 | 34  | -12 | 5.60    | 5,304        |

|       |                                                                               |     |     |     |       |        |
|-------|-------------------------------------------------------------------------------|-----|-----|-----|-------|--------|
|       | R Superior lateral occipital cortex, R Cuneal cortex                          | 22  | -78 | 54  | 4.06  | 2,624  |
|       | L/R Precuneous cortex                                                         | -14 | -58 | 42  | 4.82  | 2,304  |
|       | L/R Cerebellum                                                                | -6  | -90 | -34 | 4.73  | 2,168  |
| 3794R | R Temporal pole                                                               | 34  | -6  | -48 | 13.00 | 18,096 |
|       | L Temporal pole, L Anterior parahippocampal gyrus, L Temporal fusiform cortex | -44 | 2   | -32 | 5.31  | 5,952  |
|       | L Frontal pole, L Insula, L Frontal Operculum cortex                          | 28  | 22  | 16  | 5.04  | 4,568  |
|       | L/R Precuneous cortex                                                         | -6  | -76 | 34  | 5.00  | 2,784  |

---

Note: Z-score is voxel and cluster corrected for multiple comparisons at  $p < .05$ . Cluster size is in  $\text{mm}^3$ . Clusters smaller than 2000  $\text{mm}^3$  (250 voxels) not listed.
